# Supplementary material for: One-dimensional TeSe nano-heterojunction: formation, calculations, carrier dynamics, and application in broad-spectrum photodetectors
Source: Royal Society of Chemistry journal article supplement (doi:10.1039/d3nr00593c), 2023-01-01
Supplement: d3nr00593c1.pdf [file d3nr00593c1.pdf]

## Supporting Information

# One-Dimensional TeSe Nano-Heterojunction: Formation, Calculations, Carrier Dynamics, and Application in Broad-Spectrum Photodetectors

*Chenyang Xing*<sup>1</sup>, *Zihao Li*<sup>1</sup>, *Jian Bang*<sup>1</sup>, and *Songrui Wei*<sup>2\*</sup>, *Zhengchun Peng*<sup>1\*</sup>

<sup>1</sup> Center for Stretchable Electronics and NanoSensors, Key Laboratory of Optoelectronic Devices and Systems of Ministry of Education and Guangdong Province, College of Physics and Optoelectronic Engineering, Shenzhen University, Shenzhen 518060, China

<sup>2</sup> Interdisciplinary Center of High Magnetic Field Physics of Shenzhen University, College of Physics and Optoelectronic Engineering, Shenzhen University, Shenzhen 518060, China.

\*Corresponding Author:

E-mail: [weisongrui@126.com](mailto:weisongrui@126.com) (S.R. Wei), [zcpeng@szu.edu.cn](mailto:zcpeng@szu.edu.cn) (Z.C. Peng)

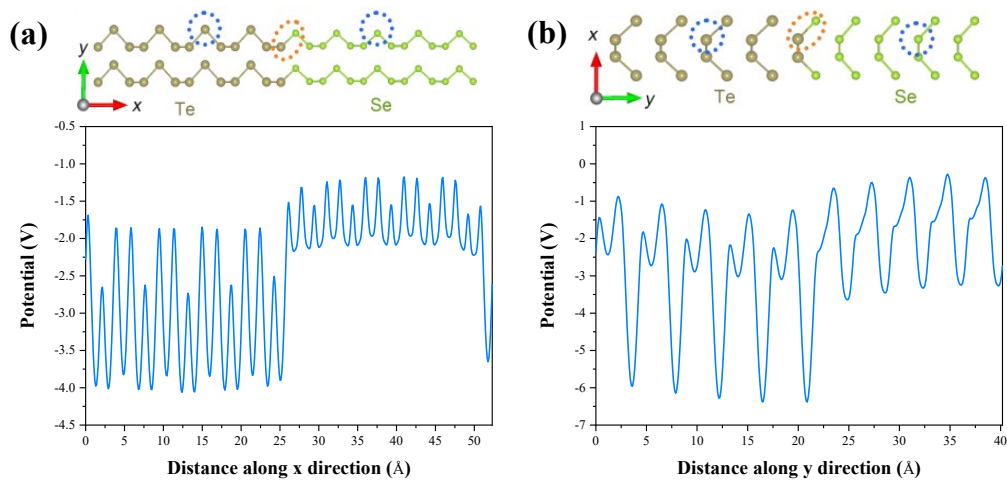

**Figure R1** Electrostatic potential of the Se/Te heterostructures along different directions: **(a)** x direction and **(b)** y direction, respectively.

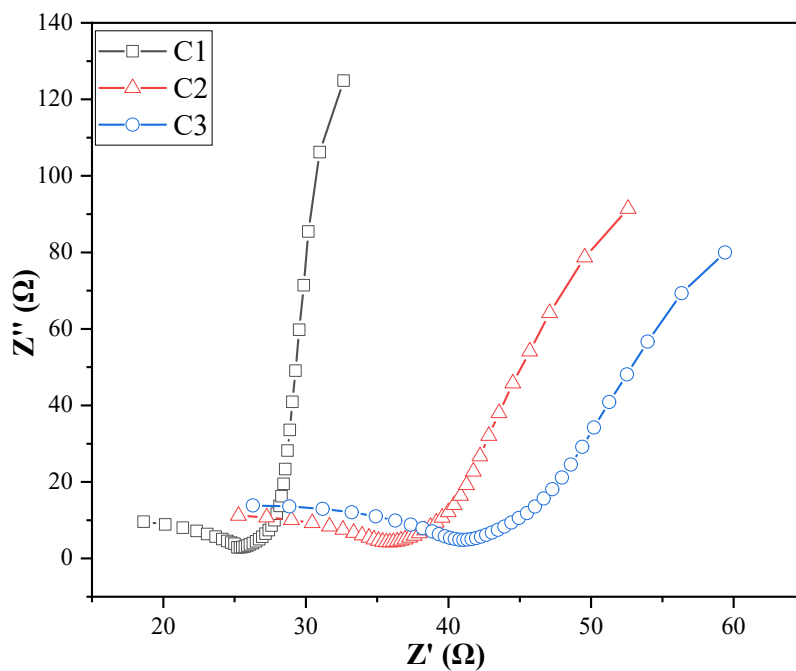

**Figure S2** Electrochemical impedance spectrum (EIS) of TeSe PDs in seawater with various concentrations under illumination by simulated light at 0.6 V.
